# Supplementary material for: Slowly expanding/evolving lesions as a magnetic resonance imaging marker of chronic active multiple sclerosis lesions
Source: PubMed Central journal article supplement — Mult Scler. 2018 Dec 19;25(14):1915–25. doi: 10.1177/1352458518814117 (PMC6876256; doi:10.1177/1352458518814117), 2018-12-19
Supplement: MSJ814117_supplementary_figure_2.pdf [file MSJ814117_supplementary_figure_2.pdf]

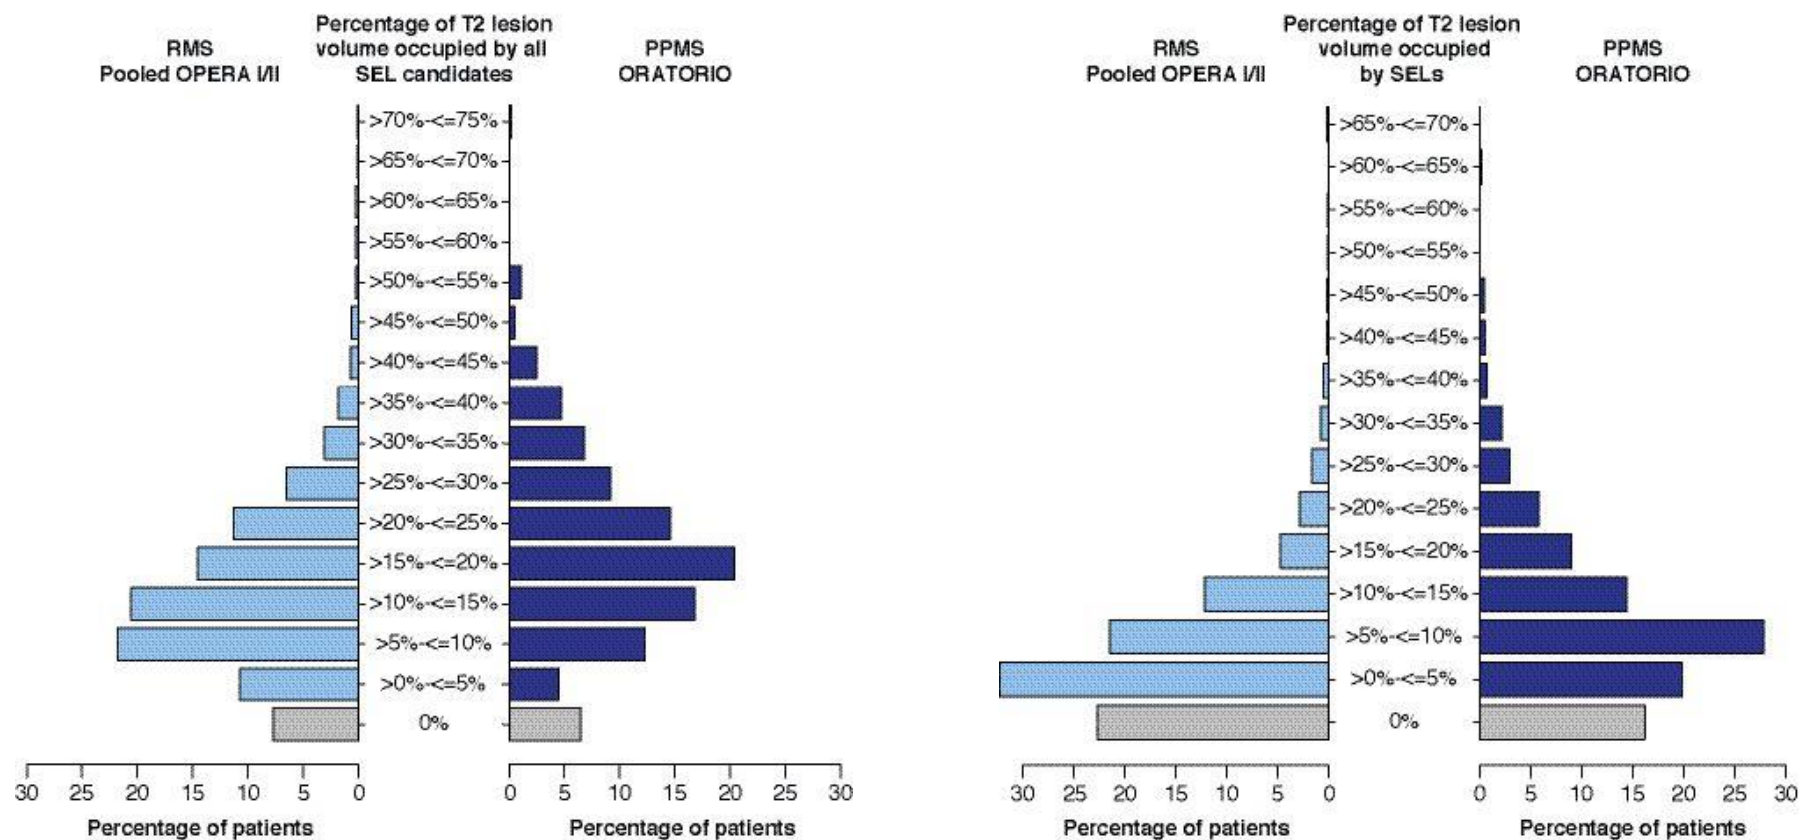

**Supplementary Figure 2.** Frequency distribution of the proportion of baseline T2 lesion volume burden identified as SELs for all SEL candidates (a) and SELs in RMS and PPMS study populations based on analysis period from baseline to Week 48 (b).

**Legend:** PPMS: primary progressive multiple sclerosis; RMS: relapsing multiple sclerosis; SEL: slowly expanding/evolving lesion.
