# Supplementary material for: Slowly expanding/evolving lesions as a magnetic resonance imaging marker of chronic active multiple sclerosis lesions
Source: PubMed Central journal article supplement — Mult Scler. 2018 Dec 19;25(14):1915–25. doi: 10.1177/1352458518814117 (PMC6876256; doi:10.1177/1352458518814117), 2018-12-19
Supplement: MSJ814117_supplementary_figure_3.pdf [file MSJ814117_supplementary_figure_3.pdf]

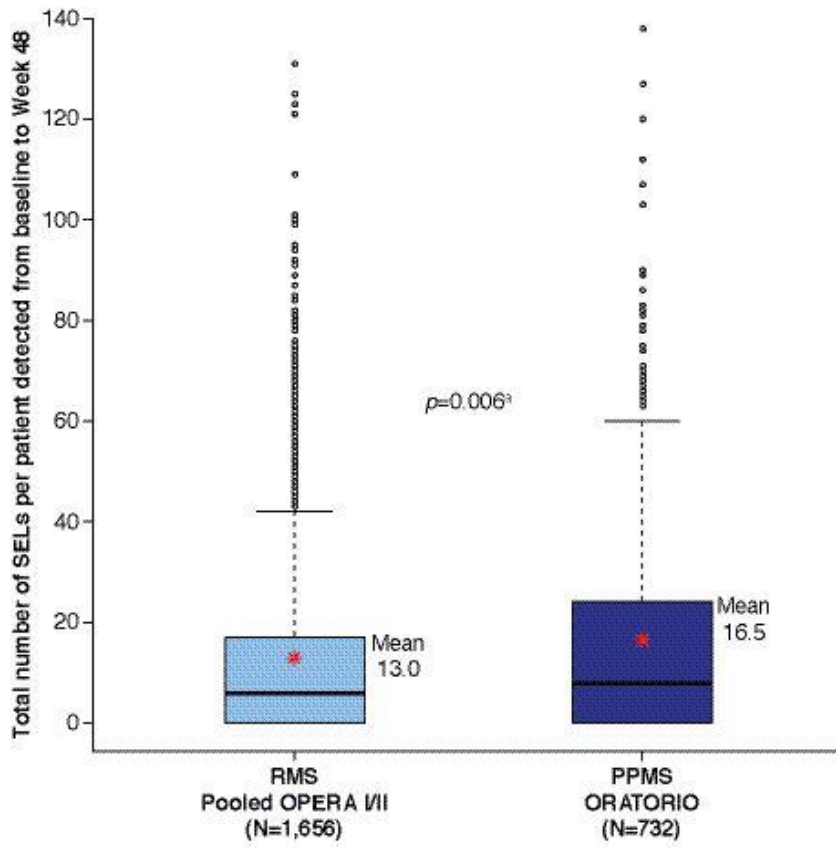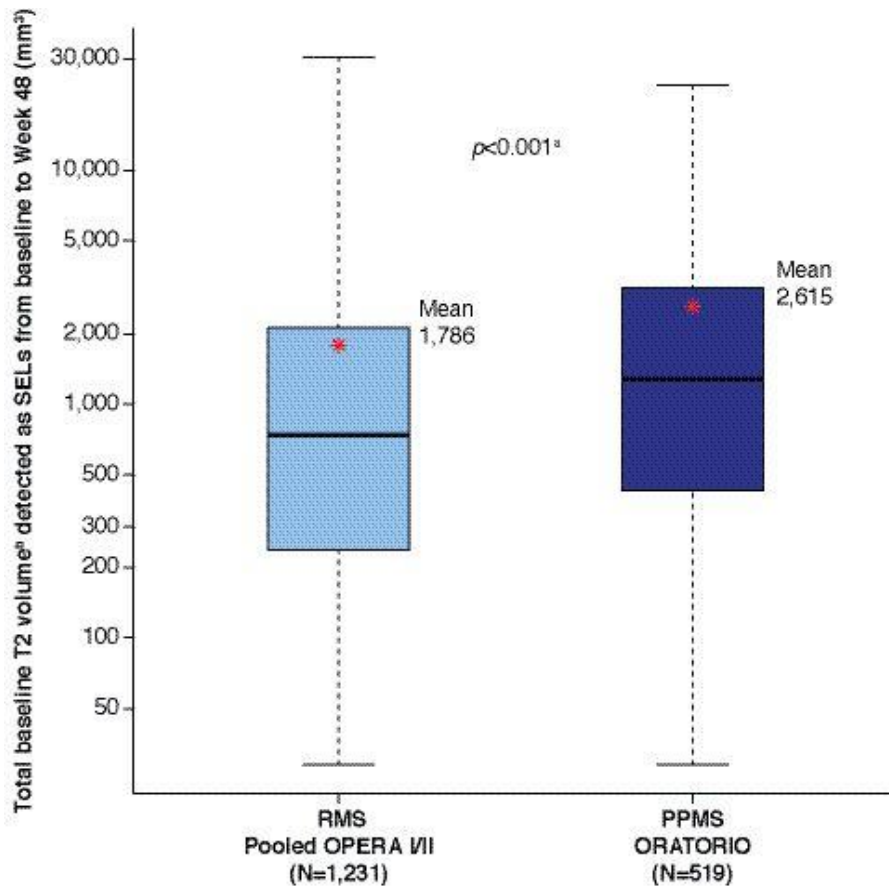

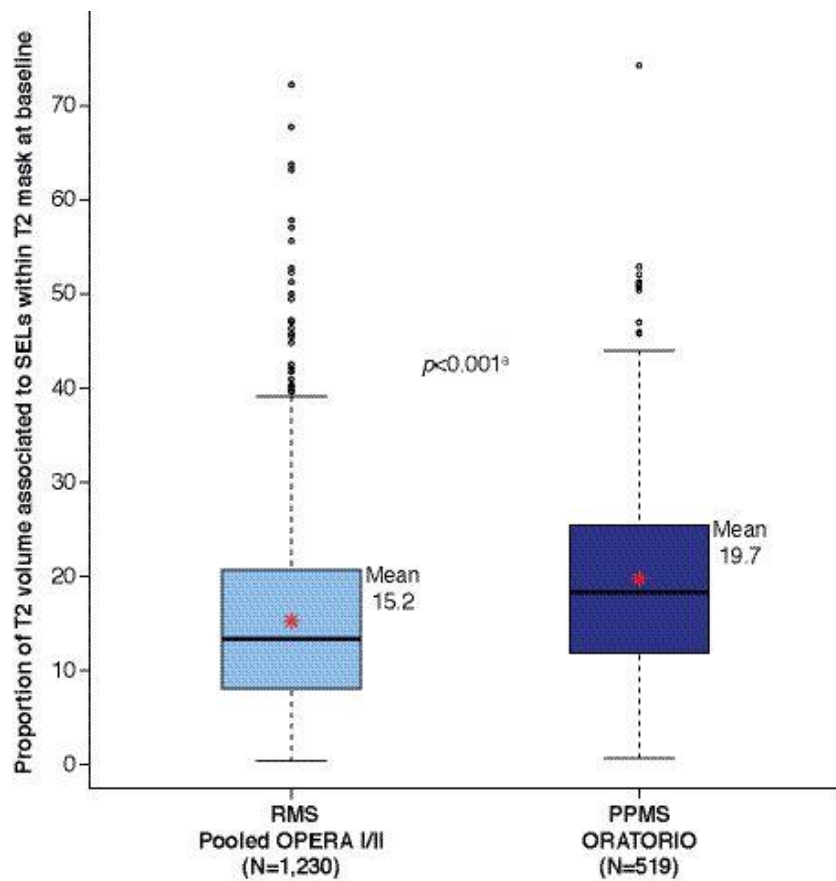

**Supplementary Figure 3.** SEL prevalence in RMS and PPMS populations (all SEL candidates).

**Legend**

For patients without any SEL or without any SEL candidates, the number of SELs is set to 0. Baseline T2 volume associated to SELs is defined as the sum of baseline T2 volume associated with each SEL candidate. Red asterisks represent the mean values.

<sup>a</sup>Van Elteren test; stratified by treatment group (ocrelizumab, control), baseline T2 lesion volume category based on tertiles ( $\leq 3.013 \text{ cm}^3$ ,  $3.013 \text{ cm}^3 - \leq 11.122 \text{ cm}^3$ ,  $> 11.122 \text{ cm}^3$ ). <sup>b</sup>Log-transformed.

PPMS: primary progressive multiple sclerosis; RMS: relapsing multiple sclerosis; SEL: slowly expanding/evolving lesion.
